1  
2  
3  
4  
5  
6  
7  
8  
9  
10  
11  
12  
13  
14  
15  
16  
17  
18  
19  
20  
21  
22  
23  
24  
25  
26

## An inexpensive remotely-operated video recording system for continuous behavioral observations

W.David Weber<sup>1\*</sup> & Heidi S. Fisher<sup>1</sup>

<sup>1</sup>Biology Department, University of Maryland, College Park, MD

\*Corresponding author

E-mail: [wweber@umd.edu](mailto:wweber@umd.edu)

### Abstract

Video recording technology is an important tool for studies of animal behavior because it reduces observer effects and produces a record of experiments, interactions among subjects, and contextual information, however it remains cost prohibitive for many researchers. Here we present an inexpensive method for building a remotely-operated video recording system to continuously monitor behavioral or other biological experiments. Our system employs Raspberry Pi computers and cameras, open-source software, and allows for wireless networking, live-streaming, and the capacity to simultaneously record from several cameras in an array. To validate this system, we continuously monitored home-cage behavior of California mice (*Peromyscus californicus*) in a laboratory setting. We captured video in both low- and bright-light environments to record behaviors of this nocturnal species, and then quantified mating interactions of California mouse pairs by analyzing the videos with an open-source event logging software. This video recording platform offers users the flexibility to modify the specifications for a range of tasks and the scalability to make research more efficient and reliable to a larger population of scientists.

## 27 **Introduction**

28

29 Behavior often represents an animal's most immediate and dynamic response to internal  
30 or external cues [1]. Behavioral data are, therefore, invaluable indicators of change, yet the  
31 complexity and diversity of behaviors can be challenging to quantify. Traditional sampling  
32 methods from live observations (e.g., scan sampling, focal animal sampling, one-zero sampling  
33 [2-3]) frequently results in an estimate, rather than a precise measure of behaviors, or only  
34 provides data from a subset of subjects or interactions within a social group [4]. The behavioral  
35 record is therefore often incomplete with live observational data, and the presence of an  
36 observer can influence the behavior of study subjects, thus biasing the results [5–7]. Moreover,  
37 to fully understand an animal's response, it is imperative to understand the context and the  
38 environment in which the behavior was expressed. Video recording enables researchers to  
39 review behaviors multiple times to yield a more complete dataset, reduces observational biases,  
40 and can capture contextual information.

41 Video recording has become a nearly ubiquitous tool for behaviorists and useful in a  
42 wide range of studies. For example, video can improve data collection in manipulative  
43 behavioral assays from studies of visual recognition in cichlids [8] and foraging in fruit flies [9], to  
44 parental care [10] and anxiety in rodents [11]. Moreover, passive monitoring approaches, such  
45 as home-cage cameras, can be used to record social behaviors, such as pair bonding in  
46 marmosets [12], or mating in whiteflies [13], guppies [14], and gerbils [15]. Outside of the lab,  
47 passive monitoring with nest box cameras have revealed unexpected behaviors including  
48 paternal care in tree swallows, even when extra-pair copulations were evident to the male [16],  
49 personality traits and social dominance in zebra finch [17], and long-term social interactions in  
50 “near natural” enclosures in house mice [4]. Continuous video recording systems provide a  
51 record of behavior and contextual information in a variety of studies from controlled laboratory  
52 assays to passive monitoring in the wild.

53           With few exceptions, continuous video recording improves the rigor and repeatability in  
54 behavioral studies, yet the technology remains cost prohibitive for researchers with limited  
55 funding or those requiring numerous cameras for complex experimental designs. Here we  
56 present an inexpensive method for building a remotely-operated video recording system using  
57 open-source software that allows for wireless networking, live-streaming, and the capacity to  
58 simultaneously record from several cameras to create an array. We then present validation of  
59 this system, in which we built an array of modules to continuously record mating behavior in  
60 California mice, *Peromyscus californicus*.

61

## 62 **Materials and Methods**

63

64           We constructed a video recording array using Raspberry Pi (RPI; Caldecote, Cambridge,  
65 UK) modules and open-source software to continuously record multiple mating pairs of captive  
66 California mice (*Peromyscus californicus*) across several reproductive cycles. We then  
67 transferred the video files to Google Drive (Google LLC, Mountain View, CA, USA) for cloud-  
68 based storage, and later scored videos using the free open-source software, BORIS (Behavioral  
69 Observation Research Interactive Software [18]).

70

### 71 Recording module assembly

72           Raspberry Pi computers are very small, inexpensive computers that offer a flexible  
73 platform to build a video recording system. Some base units can be purchased with cameras  
74 but storage and cables must be purchased separately. Table 1 describes the basic starting  
75 materials we used and ordering information. At the time of purchase, each recording module  
76 cost roughly \$50.00 to build.

77

78

79 **Table 1. Basic Materials**

| Product                                            | Comments                                                                                            |
|----------------------------------------------------|-----------------------------------------------------------------------------------------------------|
| 64 Gb micro SD card                                | A larger card can be purchased if the budget allows; be sure the card comes with a SD card adaptor. |
| Raspberry Pi Zero(W)                               | The “W” version must be purchased for WiFi connectivity.                                            |
| Raspberry Pi NoIR Camera                           |                                                                                                     |
| Pi Foundation Official Pi Zero Case (Pi Zero Case) | This is the case for the assembled components.                                                      |
| Micro HDMI charging cable                          |                                                                                                     |
| Charging dock                                      | A multiple port dock is advised if using multiple recording devices.                                |
| USB Hub                                            |                                                                                                     |

80

81 To build a recording module, we first loaded all application files, including an operating  
82 system (OS), onto a micro SD card. We used 64 Gb micro SD cards, as roughly 8 Gb must be  
83 allocated to the OS and our video files averaged 30 Gb in size. We formatted the card as MS-  
84 DOS(Fat); the “Raspbian” OS used in this application was designed to be loaded onto cards  
85 smaller than 32 Gb, therefore the 64 Gb card required reformatting. Once formatted, we loaded  
86 the “Raspbian” OS (<https://www.raspberrypi.org/downloads/noobs/>) onto the card and then  
87 installed it into the micro SD card port of a Raspberry Pi Zero(W) board (Figure 1A).

88 Next, we attached the Raspberry Pi NoIR camera to the R-Pi board (Figure 1B) and  
89 placed the board into the Pi Zero Case (Figure 1C). This step requires extreme care, as there  
90 are locking pins (see arrows in Figure 1D) that secure the board and camera to the case, thus it  
91 was necessary to bend the case to prevent damaging the R-Pi board. Once the case was  
92 closed, the recording module was complete (Figure 1D). We next attached the recording  
93 module to a monitor, mouse and keyboard with a USB hub, and then connected the module to a  
94 power source to activate the unit. The OS automatically initializes as soon as power is  
95 connected, the activation process runs for approximately 10 minutes and then the Raspbian  
96 desktop appears.

97

98

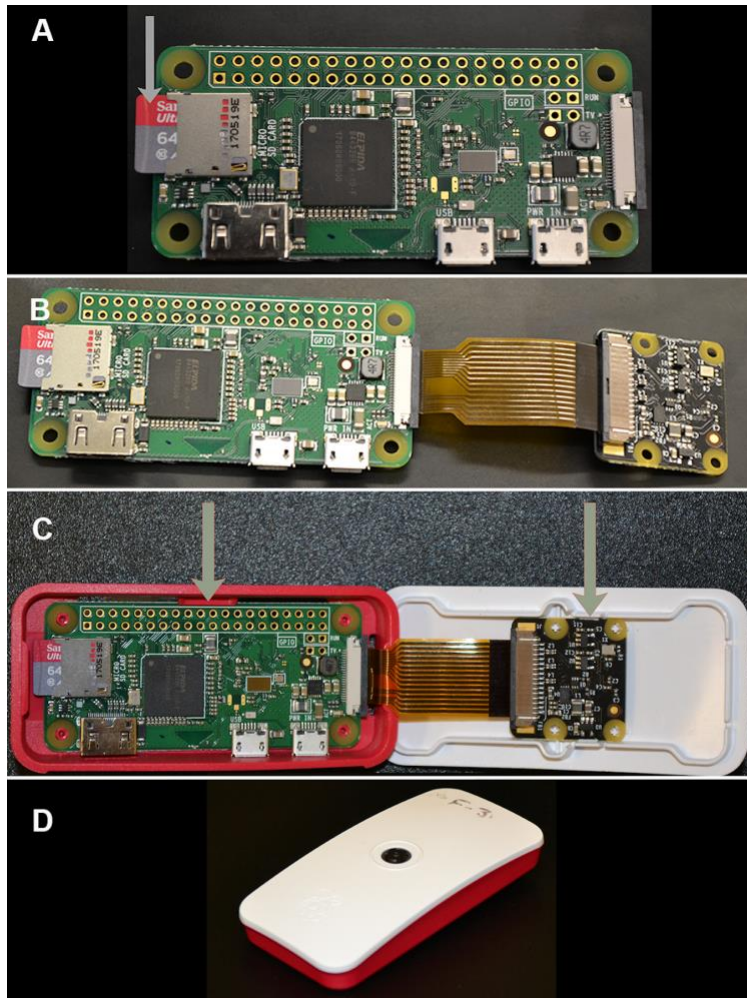

99  
100 **Figure 1. Assembly of a recording module.** (A) MicroSD card installed into a Raspberry Pi  
101 Zero(W) board. Grey arrow indicates the location of the MicroSD card port. (B) Raspberry Pi  
102 board is attached to the camera assembly. (C) Pi Zero Case. Grey arrows indicate locking pins  
103 that the board and camera must fit underneath. (D) An assembled recording module.  
104

### 105 Recording Module Programming

106 On all modules, the default username is “pi” and password is “raspberrypi”, making them  
107 susceptible to unauthorized off-network access. Therefore, we next reset the default username  
108 and password in the “Raspberry Pi Configuration Menu”. Under the interface tab of that same  
109 menu, we then enabled the “Camera”, selected “SSH” (allows for remote access) and “VNC”  
110 (allows for remote interfacing) options, and then rebooted the module. After reboot, we  
111 established an internet connection by hovering the cursor over the WiFi icon, selected the  
112 appropriate network, and logged in. By hovering the cursor over the WiFi icon after establishing

113 a connection, the IP address is revealed; with this IP address we could remotely log into the  
114 module using RealVNC Viewer (<https://realvnc.com/en/>), an open-source software.

115

## 116 Behavioral Observations

117 To assess the routine use of the video module to record social interactions, we observed  
118 mating behavior in California mice. We obtained four male and four female mice from the  
119 Peromyscus Genetic Stock Center at the University of South Carolina  
120 (<https://www.pgsc.cas.sc.edu/>), and housed them at the University of Maryland, in accordance  
121 with the Institutional Animal Care and Use Committee policies (protocol number: R-Jul-18-38),  
122 and in standard transparent laboratory rodent cages lined with cedar shavings. We provided  
123 food and water *ad libitum* and maintained all mice at 22°C in a 16:8 light-dark cycle, simulating  
124 this species' breeding season [19].

125 To record the mating behavior, we placed a male and a female into a cage on a camera  
126 rack (Figure 2). Camera stands can be easily purchased online or 3D printed, but we fashioned  
127 a rack from metal shelving on which we attached two blocks cut from recycled styrofoam at  
128 either end to hold the two recording modules per cage, in the middle of which we placed a cage  
129 (Figure 2). We recorded from four pairs, each with their own pair of recording modules. We  
130 recorded behaviors during the light period with one module and used a second module to record  
131 behavior during the dark period while the room was illuminated with red lights and infrared LED  
132 lights. We found that using two modules, each set to parameters optimized for each light  
133 environment, was the most effective way for us to obtain high quality video across the entire  
134 light-dark cycle, however a single camera can be programmed to adjust parameters at different  
135 times through the day. In our setup, the size of the files produced from using a single module  
136 exceeded the capacity of the micro-SD card, and we found that adding a second module was  
137 more cost effective than using a high-capacity micro-SD card.

138

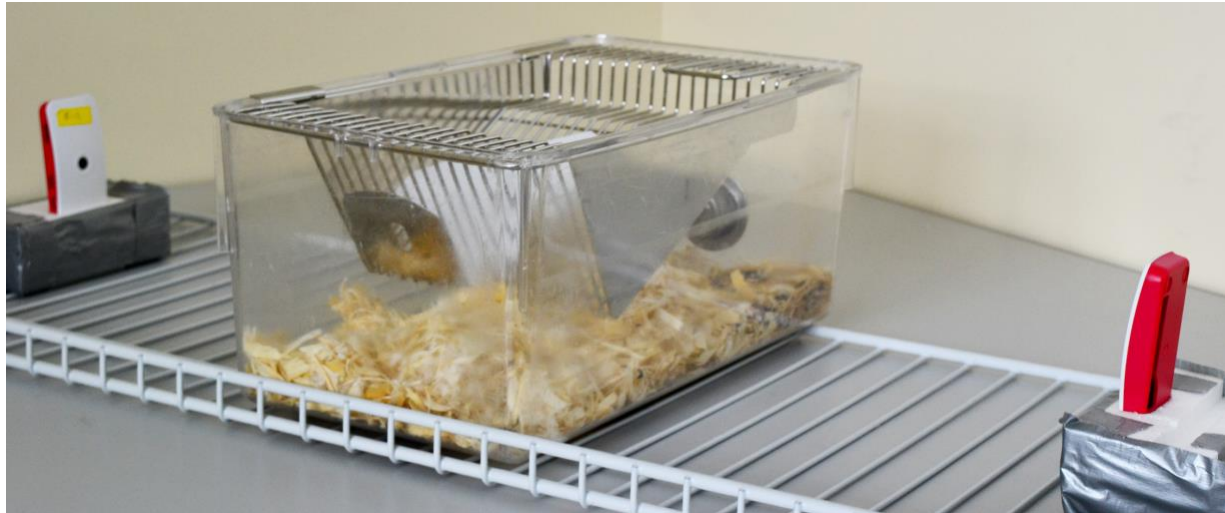

139  
140 **Figure 2. Assembled camera rack with animal cage.**  
141

142           Next, we remotely logged into the modules using a Python 3 shell (selected from the  
143 programming menu on the Raspbian desktop) and executed the camera script (Table S-1; all  
144 coding scripts described in this article can also be accessed at  
145 <https://github.com/wdavidweber/Pi-Recording-Module>). To send video files directly to a Google  
146 Drive folder, we used an additional script because the software is not included in the Raspbian  
147 OS. Using the terminal console in Raspbian, we uploaded the “rclone” (Nick Craig-Wood ©  
148 2012) open-source software (Table S-2), and regularly monitored the modules and Google  
149 Drive folders. Free storage on Google Drive is limited to 15Gb, unless an unlimited account is  
150 available to you, therefore, files may need to be downloaded and transferred prior to filling the  
151 storage. To score the behaviors in BORIS, we converted the .h264 format files (the default  
152 Raspbian filetype) into “.mp4” format using the “ffmpeg” package, available in the Raspbian OS  
153 (the code for this is the last line of script in Table S-1). We performed the file conversion using a  
154 High-Performance Computing Cluster at the University of Maryland because our video files  
155 were too large and numerous to be converted on the modules. In most situations, this can be  
156 done on the module itself, or the conversion can be performed on any workstation. When  
157 necessary, we live-streamed footage with a YouTube account (<https://www.youtube.com/>) by

158 loading “Docker” onto the module (Table S-3). With this method, video recording and live-  
159 streaming cannot be accomplished simultaneously.

160 To quantify mating behavior, we scored videos using the open-source software, BORIS,  
161 and developed an ethogram based on the work of Dewsbury [20]. We recorded the frequency of  
162 mounts, intromissions, and ejaculations, as well as intromission latency (the time between the  
163 start of a reproductive bout and the first intromission), ejaculation latency (the time between the  
164 first intromission and the subsequent ejaculation), post-ejaculatory interval (the time between an  
165 ejaculation and the beginning of the next copulatory bout), reproductive event (the total duration  
166 of all mating events during a female’s single reproductive period, beginning with the first  
167 mounting event and concluding with the last ejaculation), copulatory bout (the duration between  
168 the first mounting event and the first ejaculation).

169

## 170 **Results**

171

172 We continuously recorded home-cage behavior for three weeks from four pairs of  
173 California mice. In total, we collected 2016 hours of video, which resulted in roughly 2 TB of  
174 data. Recording one hour of footage during the light period (Figure 3A-B) under white lights, at a  
175 resolution of 1280 x 768, a framerate of 15 frames per second, and a brightness value of 70,  
176 resulted in recordings that were 440 Mb to 500 Mb in size. Recording one hour of footage during  
177 the dark period (under room red lights and LED infrared lights mounted above the cage; Figure  
178 3C-D) at a resolution of 1280 x 768, a framerate of 15 frames per second, and a brightness  
179 value of 80, resulted in recordings of 1.5 Gb to 2 Gb in size. This difference in brightness  
180 variables was the result of room illumination, there is more illumination in the room under white  
181 light than while under red light. By reducing the parameters for resolution, framerate, or  
182 brightness small files are generated, but the footage is less resolved.



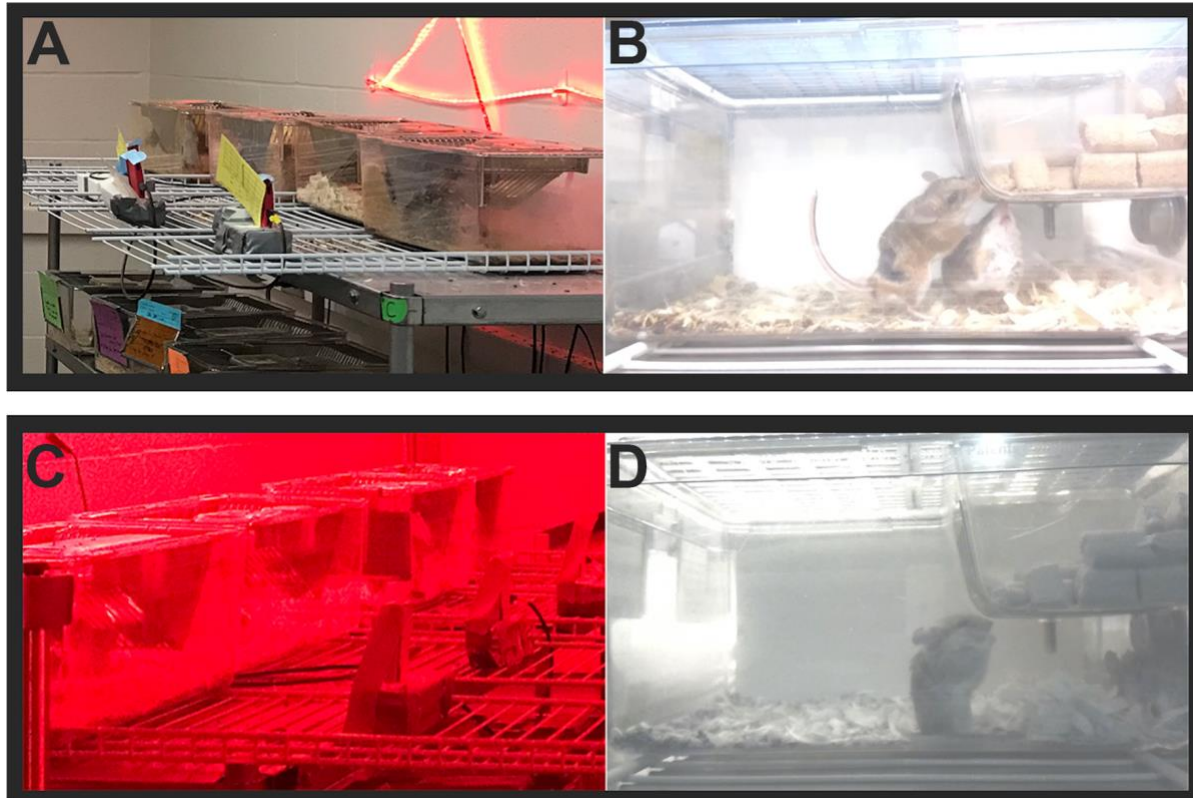

183  
184 **Figure 3. Recording module array and output.** (A) The array during the light period with room  
185 illuminated by white lights, note the infrared LED lights over the cages (not needed for bright  
186 light conditions, shown here as an example). (B) Still of a video obtained during the light period,  
187 one animal as a spot shaven on his back for identification purposes. (C) The same array in (A)  
188 but the image is taken from the opposite side while during the dark period under room red lights  
189 and infrared LED lights mounted above cages (not shown here). (D) Still image from a video  
190 obtained during the dark period.  
191

192 We scored mating behavior from the one pair that successful produced a litter after the  
193 mating trial. The active mating period spanned a total of 5 hours, 24 minutes, and 3 seconds of  
194 footage, all of which occurred during the dark period of the photocycle and included two  
195 copulatory bouts. The first mating bout spanned 4 minutes, 15 seconds, and included 8 mounts,  
196 3 intromissions and a single ejaculation; the second bout spanned 2 minutes, 45 seconds and  
197 included 6 mounts, 5 intromissions and a single ejaculation. We found that the mean  
198 intromission latency was 1 minute, 49 seconds and the mean ejaculation latency was 1 minute  
199 42 seconds. The two copulatory bouts were separated by a 36 minutes, 39 second refractory  
200 period.

## 201 Discussion

202

203 Here we describe a remotely-operated video recording system to monitor animal  
204 behavior using wireless networking. This tool permits user-determined specifications, including  
205 live-streaming and multiplexing, and has the capacity to simultaneously record and upload data  
206 files for storage. Moreover, this system allows for continuous behavioral monitoring on a flexible  
207 timescale. The cost of the recording module that we describe is less or comparable to some  
208 pre-assembled commercial surveillance cameras, which like the RPi recording module, often  
209 use SD cards to store footage and may provide cloud storage for a fee with restricted  
210 allocations. However the system described here offers a wider range of low-cost modifications  
211 to suit a variety of research environments by incorporating open-source software add-ons.

212 For validation purposes, we used the video capture system we report here to record, and  
213 subsequently quantify, mating behavior in the California mouse. Once we positioned the  
214 cameras in place in our animal facility, we controlled the modules from our laboratory located in  
215 another building. This design eliminated possible observer effects on the animals' behavior,  
216 provided contextual information on the animals' environment, and allowed for off-hours  
217 monitoring of the animal housing space. Furthermore, with the addition of infrared LED lights,  
218 we were able to record mating behavior of this nocturnal species without interruption or  
219 disturbance.

220 In the research setting, our video recording system can be applied to tasks beyond  
221 animal behavior experiments. For example, this system could be used to remotely monitor  
222 chemical reactions or other assays in which timing is uncertain, or if the modules are housed  
223 within an incubator, to monitor bacterial or embryo culture. The flexible platform, scalability and  
224 low cost of our "do it yourself" video recording system is a powerful lab tool to make research  
225 more efficient and reliable to a larger population of scientists.

226

## 227 **Acknowledgements**

228 We thank Andrés Bendesky, whose use of Raspberry Pi cameras to record parental care  
229 behavior in *Peromyscus* inspired us to build and report on the system presented here. We also  
230 thank Irene Lui for her computer programming guidance, Erica Glasper for the experimental  
231 animals, and R. Zaak Walton, whose thoughtful discussion and advice were essential to this  
232 project.

233

## 234 **References**

- 235 1. Bretman A, Gage M, Chapman T. Quick-change artists: male plastic behavioural  
236 responses to rivals. *Trends Ecol Evol.* 2011;26(9):467–73.
- 237 2. Altmann J. *Observational Study of Behavior: Sampling Methods.* Behaviour [Internet].  
238 1974;49(3/4):227–67.
- 239 3. Martin P, Bateson P. *Measuring behaviour: An introductory guide.* 2nd, editor.  
240 Cambridge, EN, UK: Cambridge University Press; 1995.
- 241 4. Weissbrod A, Shapiro A, Vasserman G, Edry L, Dayan M, Yitzhaky A, et al. Automated  
242 long-term tracking and social behavioural phenotyping of animal colonies within a semi-  
243 natural environment. *Nat Commun.* 2013;4(May):1–10.
- 244 5. Wilson S. The use of ethnographic techniques in educational research. *Rev Educ Res.*  
245 1977;47(2):245–65.
- 246 6. Monahan T, Fisher J. Benefits of “observer effects”: Lessons from the field. *Qual Res.*  
247 2010;10(3):357–76.
- 248 7. Herbert R, James F. The Hawthorne experiments: first statistical interpretation. *Am Sociol*  
249 *Rev.* 1978;43(5):623–43.
- 250 8. Escobar-Camacho D, Marshall J, Carleton K. Behavioral color vision in a cichlid fish:  
251 *Metriacroma benetos.* *J Exp Biol* [Internet]. 2017;220(16):2887–99.
- 252 9. Jang EB, Light DM. Behavioral responses of female oriental fruit flies to the odor of  
253 papayas at three ripeness stages in a laboratory flight tunnel (*Diptera: Tephritidae*). *J*  
254 *Insect Behav.* 1991;4(6):751–62.
- 255 10. Bendesky A, Kwon YM, Lassance JM, Lewarch CL, Yao S, Peterson BK, et al. The  
256 genetic basis of parental care evolution in monogamous mice. *Nature*
- 257 11. Leuner B, Glasper ER, Gould E. Sexual experience promotes adult neurogenesis in the

- 258 hippocampus despite an initial elevation in stress hormones. PLoS One. 2010;5(7).
- 259 12. Gerber P, Schnell C, Gusti A. Behavioral and cardiophysiological responses of Common  
260 Marmosets (*Callithrix jacchus*) to social and environmental changes. Primates.  
261 2002;43(July):201–16.
- 262 13. Ruan YM, Luan JB, Zang LS, Liu SS. Observing and recording copulation events of  
263 whiteflies on plants using a video camera. Entomol Exp Appl. 2007;124(2):229–33.
- 264 14. Pilastro A, Mandelli M, Gasparini C, Dadda M, Bisazza A. Copulation duration,  
265 insemination efficiency and male attractiveness in guppies. Anim Behav. 2007;74(2):321–  
266 8.
- 267 15. Prates EJ, Guerra RF. Parental care and sexual interactions in Mongolian gerbils  
268 (*Meriones unguiculatus*) during the postpartum estrus. Behav Processes.  
269 2005;70(2):104–12.
- 270 16. Whittingham L, Dunn P, Robertson R. Confidence of paternity and male parental care: an  
271 experimental study in tree swallows. Anim Behav. 1993;139–47.
- 272 17. Morgan D, Auclair Y, Cezilly F. Personality predicts social dominance in female zebre  
273 finches, *Taeiopygia guttata*, in a feeding context. Anim Behav. 2011;81(1):219–24.
- 274 18. Friard O, Gamba M. BORIS: a free, versatile open-source event-logging software for  
275 video/audio coding and observations. Methods Ecol Evol. 2016;7(11):1325–30.
- 276 19. Kirkland GL, Layne JN. Advances in the study of *Peromyscus* (*Rodentia*). Lubbock, TX,  
277 USA: Texas Tech University Press; 1989.
- 278 20. Dewsbury D. Copulatory behavior of White-Footed mice (*Peromyscus leucopus*). J  
279 Mammal. 1975;56(2):420–8.

280

281

282

283

284

285

286

287

288

## 289 Supplemental Material

290 Table S-1. Camera operation and recording script

| Line | Python Script                                                                                           |
|------|---------------------------------------------------------------------------------------------------------|
| 1    | <code>from picamera import PiCamera</code>                                                              |
| 2    | <code>from time import sleep</code>                                                                     |
| 3    | <code>import os</code>                                                                                  |
| 4    |                                                                                                         |
| 5    | <code>camera = PiCamera()</code>                                                                        |
| 6    |                                                                                                         |
| 7    | <code>camera.resolution = (1280, 768)</code>                                                            |
| 8    | <code>camera.framerate = 15</code>                                                                      |
| 9    | <code>camera.brightness = 70</code>                                                                     |
| 10   | <code>camera.start_preview()</code>                                                                     |
| 11   | <code>camera.start_recording('/home/pi/Videos/Recording.h264')</code>                                   |
| 12   | <code>sleep(61200)</code>                                                                               |
| 13   |                                                                                                         |
| 14   | <code>os.system('ffmpeg -vcodec h264 -i Recording.h264 -vcodec copy -acodec copy Recording.mp4')</code> |
| 15   | <code>os.system('rclone sync /home/pi/Videos/Recording.mp4 picam:AA')</code>                            |
| 16   | <code>rm /home/pi/Videos/Recording.h264</code>                                                          |

291 Explanation: (1) This line activates the software for the camera. (2) This line tells the unit to use  
292 the sleep software for timing. (3) This command allows the OS to operate in the python shell. (4)  
293 Skip this line. (5) This line instructs the camera to execute the following script. (6) Skip this line.  
294 (7) This sets the resolution for the recording. (8) This sets the framerate for the recording. (9)  
295 This sets the brightness for the recording. (10) This command begins camera operations at the  
296 script execution. (11) This command begins recording at the execution, and places files where  
297 directed [e.g., ("")]. (12) This command sets the recording time (e.g., 61200 seconds). (13) Skip  
298 this line. (14) This line instructs the R-Pi to convert the recording into .mp4 format. (15) This  
299 command uploads the recording onto the specified Google Drive folder. (16) This removes the  
300 .h264 file that was used to make the .mp4 video.

301

302

303

304

305

306

307

308

309

310

311 Table S-2. Rclone installation and GDrive connection script

| Line | Unix Script                                                                                                                                                                                                               |
|------|---------------------------------------------------------------------------------------------------------------------------------------------------------------------------------------------------------------------------|
| 1    | <code>curl -L <a href="http://raw.githubusercontent.com/pageauc/pi-timolo/master/source/pi-timolo-install.sh">http://raw.githubusercontent.com/pageauc/pi-timolo/master/source/pi-timolo-install.sh</a>  <br/>bash</code> |
| 2    | <code>rclone config</code>                                                                                                                                                                                                |
| 3    | <code>n</code>                                                                                                                                                                                                            |
| 4    | <code>picam</code>                                                                                                                                                                                                        |
| 5    | <code>storage&gt; 12</code>                                                                                                                                                                                               |
| 6    | <code>client id&gt;</code>                                                                                                                                                                                                |
| 7    | <code>client_secret&gt;</code>                                                                                                                                                                                            |
| 8    | <code>scope&gt; 1</code>                                                                                                                                                                                                  |
| 9    | <code>root_folder_id&gt;</code>                                                                                                                                                                                           |
| 10   | <code>service_account_file&gt;</code>                                                                                                                                                                                     |
| 11   | <code>y/n&gt; n</code>                                                                                                                                                                                                    |
| 12   | <code>y/n&gt; n</code>                                                                                                                                                                                                    |
| 13   | <code>y/n&gt; n</code>                                                                                                                                                                                                    |
| 14   | <code>y/e/d&gt; y</code>                                                                                                                                                                                                  |

312 Explanation: (1) This script uploads the rclone software onto the R-Pi, the script will take several  
313 minutes to run. (2) This command opens the rclone configurations. (3) The next prompt will ask  
314 you to make a new or edit a remote, “n” indicates new. (4) The next prompt will ask for a name  
315 of the new remote, which can be anything but must match the code in Table 2, line 15 (e.g.,  
316 picam). (5) There are many virtual cloud storage options with the rclone software, this prompt  
317 will ask you to select the one from the list that appears, in our case that was “12” for GDrive. (6)  
318 Leave this prompt blank. (7) Leave this prompt blank. (8) This prompt allows you to select  
319 permissions of the connection. As long as a secured network is used, full access or “1” is the  
320 best setting. (9) Leave this prompt blank. (10) Leave this prompt blank. (11) In this prompt, we  
321 selected “n” to not use advanced settings. (12) In this prompt, we selected “n” for auto  
322 configuration. The result of this is a URL that must be copied into a web browser that is logged  
323 into a Google Drive account. After the authentication steps, Google yields a code that should be  
324 copied and pasted into the next prompt. (13) This prompt asks if the account is a Team Drive,  
325 for which we selected “n” for no. (14) In the final prompt, there should be a list of remotes where  
326 the new remote should appear, it will ask if everything looks correct, we selected “y” for yes.  
327

328

329

330

331

332

333

334

335

336 Table S-3. Docker script for live-streaming

| Line | Unix Script                                                                                     |
|------|-------------------------------------------------------------------------------------------------|
| 1    | <code>curl -sSL <a href="https://get.docker.com">https://get.docker.com</a>   sh</code>         |
| 2    | <code>sudo usermod pi -aG docker</code>                                                         |
| 3    | <code>reboot</code>                                                                             |
| 4    | <code>docker pull alesellis2/streaming:07-05-2018</code>                                        |
| 5    | <code>docker run --privileged --name XXX -ti alexellis2/streaming:07-05-2018 XX-XXX-XXXX</code> |

337 Explanation: (1) This script uploads the docker software onto the R-Pi, the script will take  
338 several minutes to run. (2) This script initiates the docker settings in the R-Pi and will again take  
339 several minutes to run. (3) This command reboots the R-Pi. (4) Once the terminal is opened  
340 again, this command updates the docker structure in the R-Pi. At this point the R-Pi is ready to  
341 live stream. (5) This script activate the live-streaming. The first series of XXX was a unique  
342 name for the particular stream, the second set of XX-XXX-XXXX represents the YouTube key  
343 associated with the account.
